# Supplementary material for: Bacterial Community Composition and Dynamics Spanning Five Years in Freshwater Bog Lakes
Source: PubMed Central journal article supplement (PMC5489657; doi:10.1128/msphere.00169-17), 2017-06-28

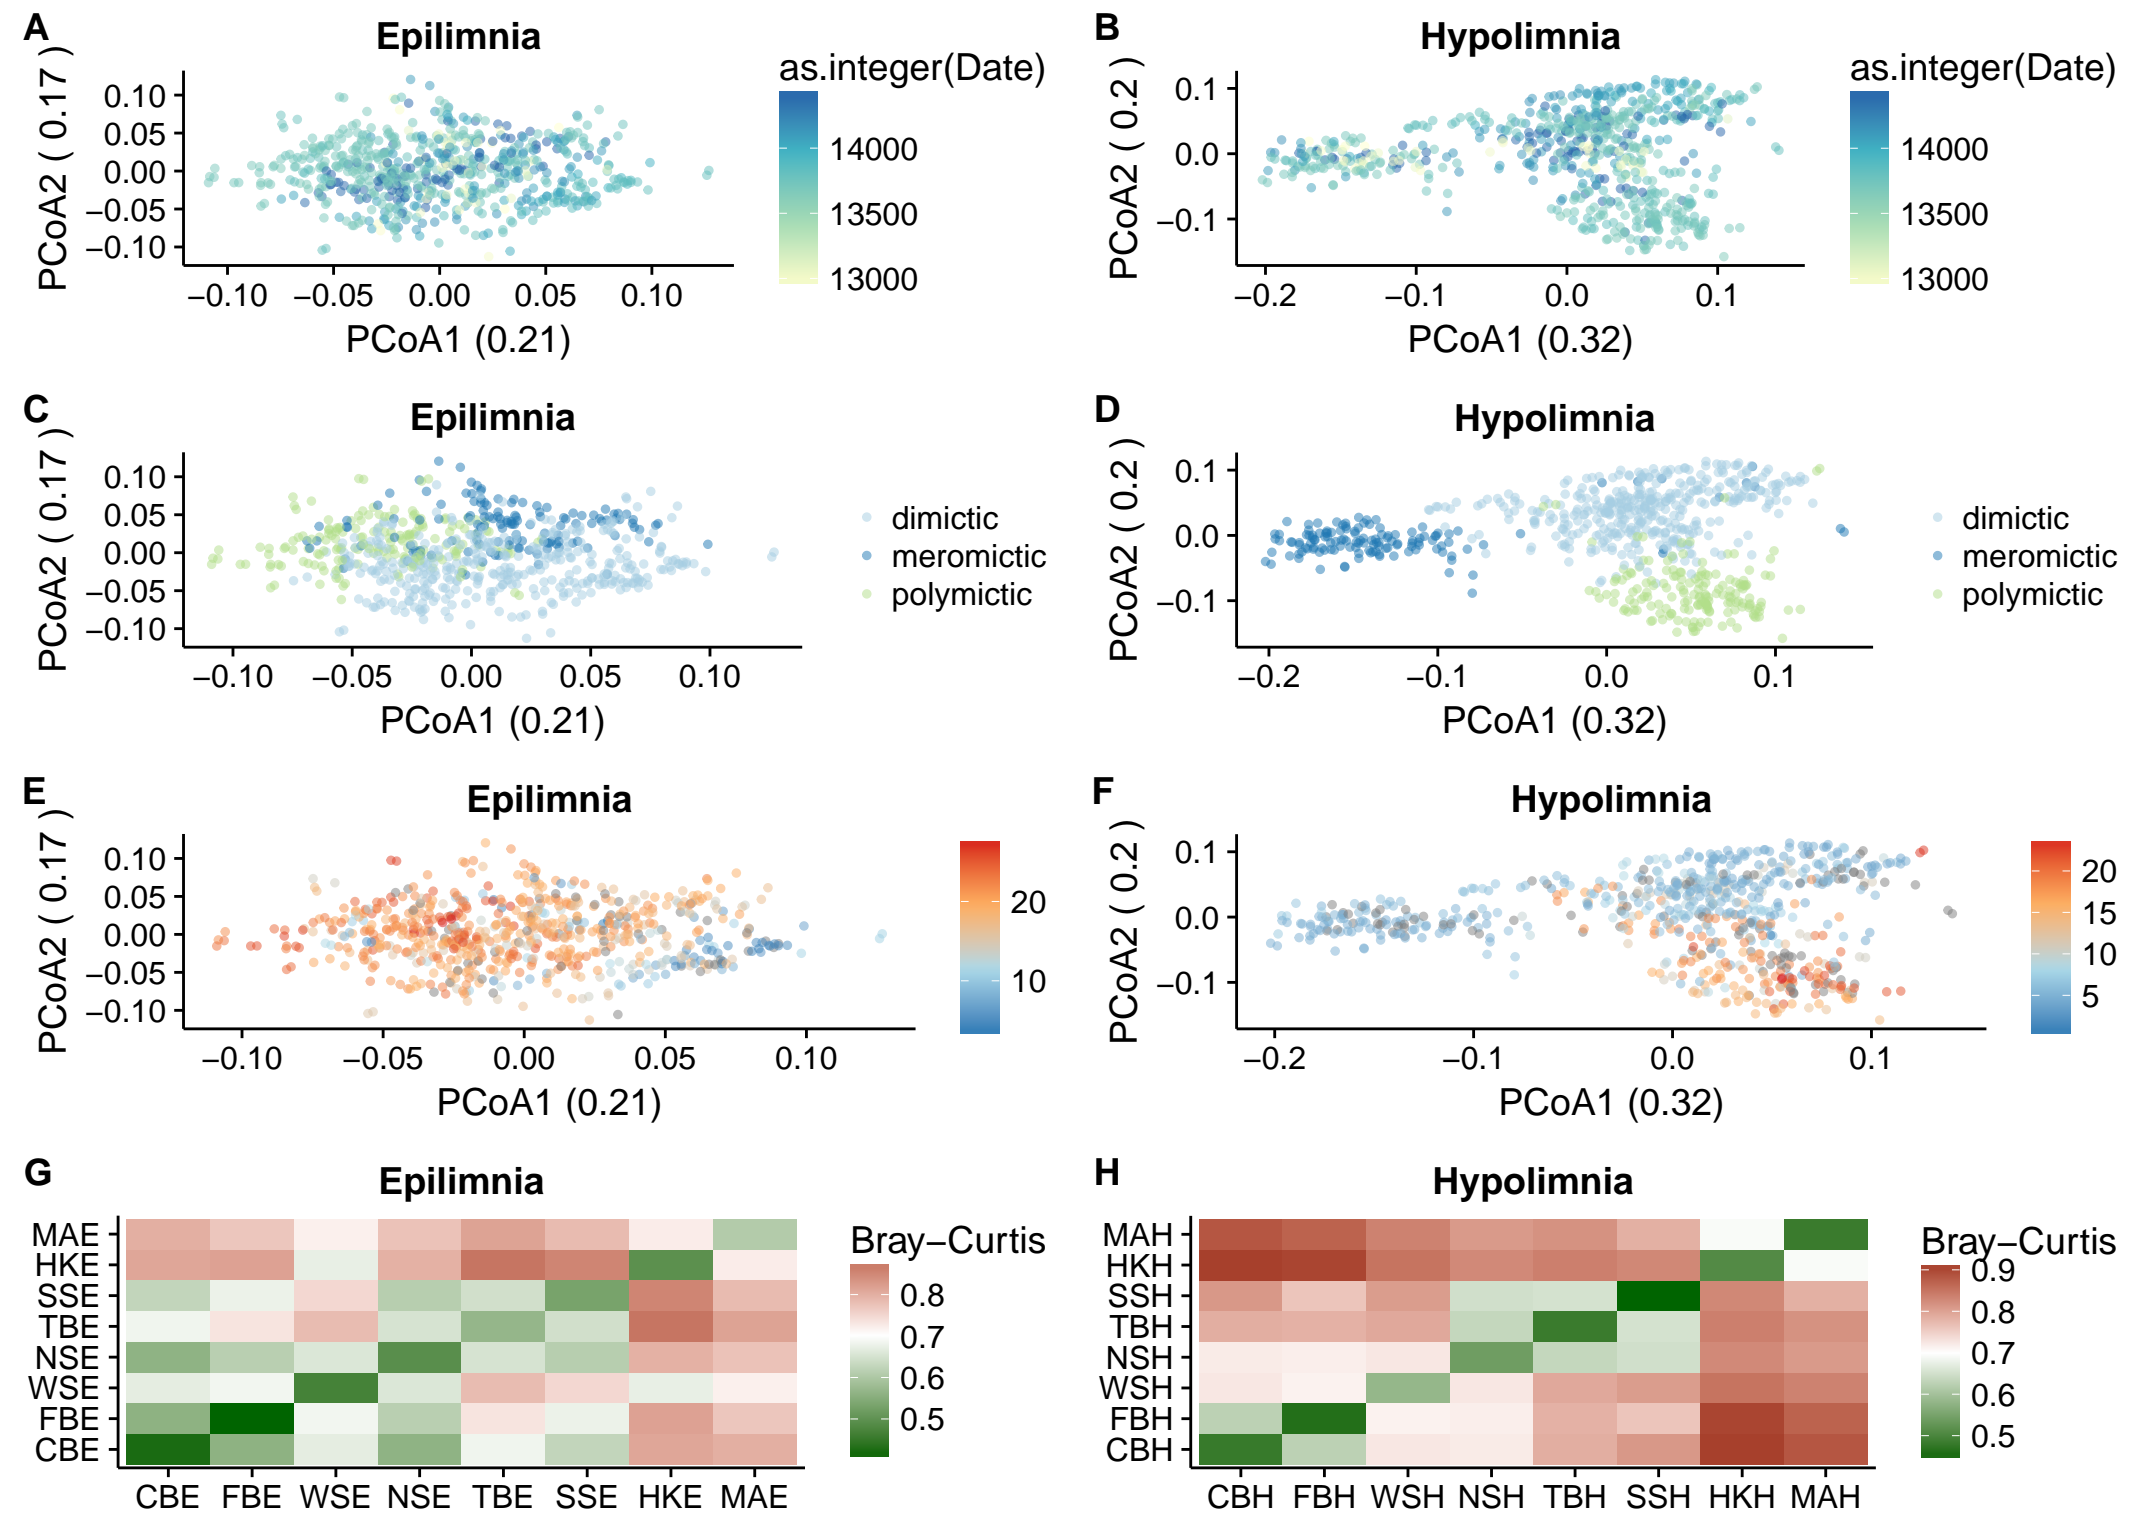

Supplement: sph003172312sf6.pdf [file sph003172312sf6.pdf]
